# Supplementary material for: Development of a “single-click” analytical platform for the detection of cannabinoids in hemp seed oil
Source: Royal Society of Chemistry journal article supplement (doi:10.1039/d0ra07142k), 2020-01-01
Supplement: d0ra07142k1.pdf [file d0ra07142k1.pdf]

Supplementary materials

## Development of a “single-click” analytical platform for the detection of cannabinoids in hemp seed oil

Roberta Risoluti<sup>a</sup>, Giuseppina Gullifa<sup>a</sup>, Alfredo Battistini<sup>b</sup> and Stefano Materazzi<sup>a\*</sup>

### Figures

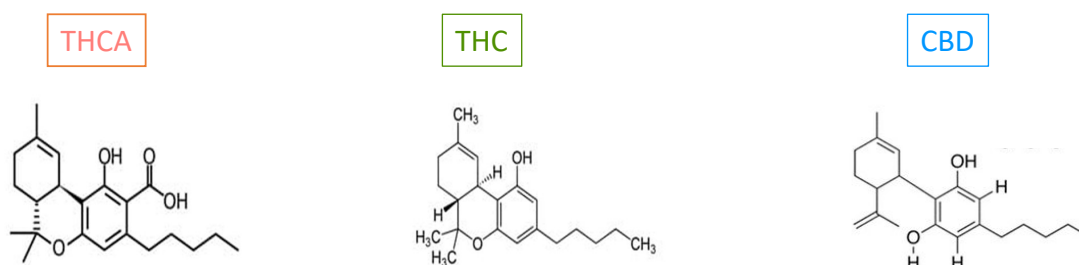

Figure 1S. Molecular structures of cannabinoids investigated in this study.

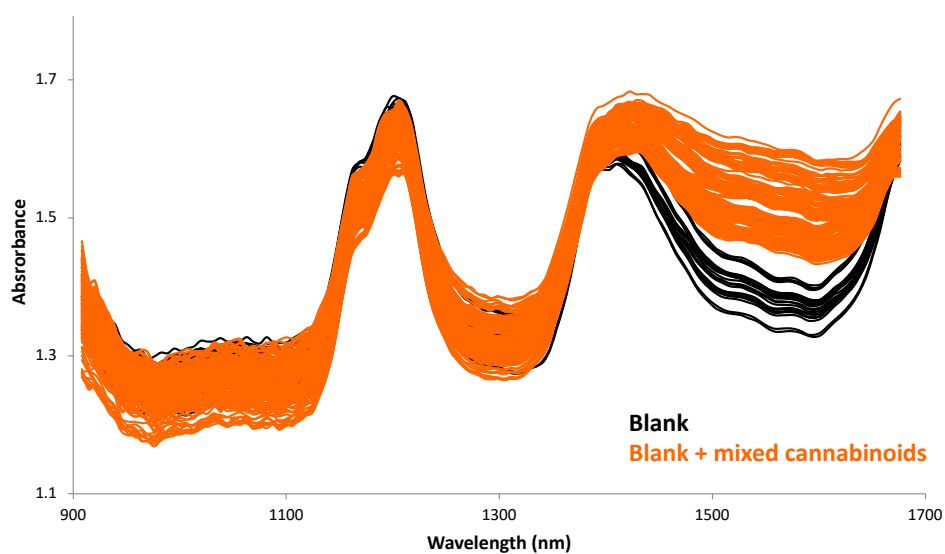

Figure 2S. Collected spectra of oils (black) and oils fortified with a mixed solution of THC, THCA and CBD (orange)

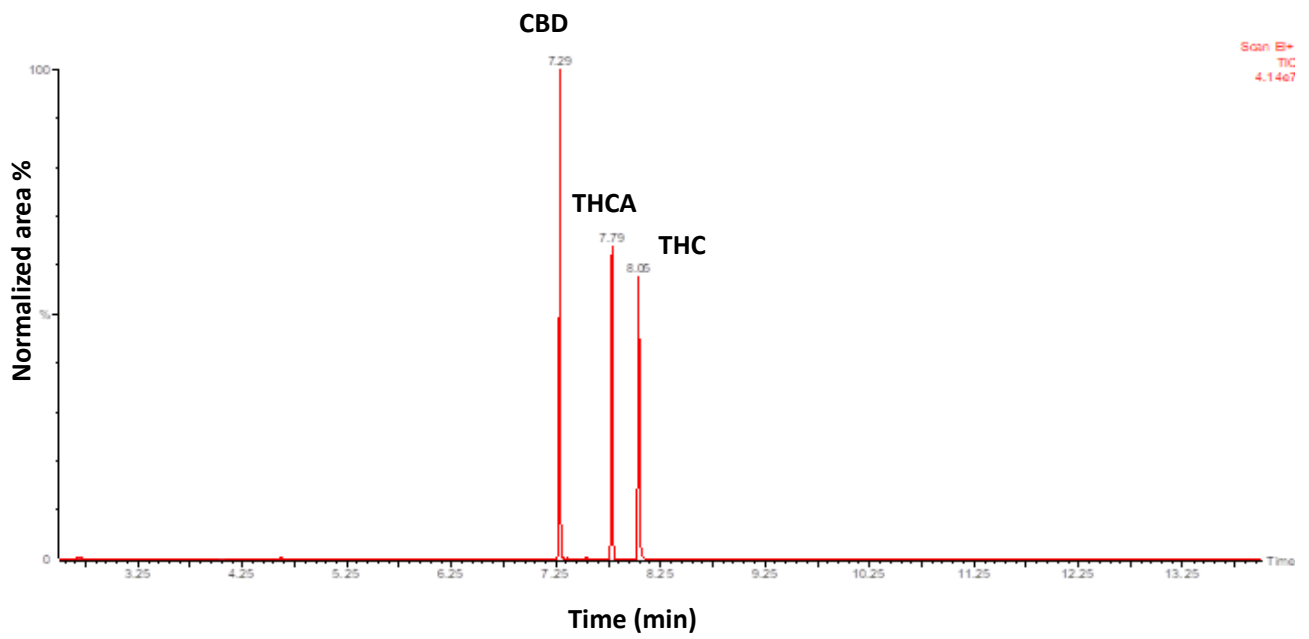

Figure 3S. Total Ion Chromatogram (TIC) of the standard mix of cannabinoids
